# Supplementary material
Source: ML conference proceedings conference paper supplement (https://openreview.net/forum?id=16IIkb5wYe)
Supplement: supplementary_material [file attachment]

# FAST UNSUPERVISED DEEP OUTLIER MODEL SELECTION WITH HYPERNETWORKS

**Anonymous authors**

Paper under double-blind review

## ABSTRACT

Outlier detection (OD) has a large literature as it finds many applications in the real world. Deep neural network based OD (DOD) has seen a recent surge of attention thanks to the many advances in deep learning. In this paper, we consider a critical-yet-understudied challenge with unsupervised DOD, that is, effective hyperparameter (HP) tuning or model selection. While prior work report the sensitivity of OD models to HP choices, it is ever so critical for the modern DOD models that exhibit a long list of HPs. We introduce `HYPER` for HP-tuning DOD models, tackling two key challenges: (1) validation without supervision (due to lack of labeled outliers), and (2) efficient search of the HP/model space (due to exponential growth in the number of HPs). A key idea is to design and train a novel hypernetwork (HN) that maps HPs onto optimal weights of the main DOD model. In turn, `HYPER` capitalizes on a *single* HN that can dynamically generate weights for *many* DOD models (corresponding to varying HPs), which offers significant speed-up. In addition, it employs meta-learning on historical OD tasks with labels to train a performance estimator function, likewise trained with our proposed HN efficiently. Extensive experiments on a testbed of 35 benchmark datasets show that `HYPER` achieves 7% performance improvement and  $4.2\times$  speed up over the latest baseline, establishing the new state-of-the-art.

## 1 INTRODUCTION

With recent advances in deep learning, deep neural network (NN) based outlier detection (DOD) has seen a surge of attention Pang et al. (2021); Ruff et al. (2021). These models, however, inherit many hyperparameters (HPs); architectural (e.g. depth, width), regularization (e.g. dropout rate, weight decay), and optimization HPs (e.g. learning rate). As expected, their performance is highly sensitive to the HP settings Ding et al. (2022). This makes effective HP or model selection critical, yet computationally costly as the model space gets exponentially large in the number of HPs.

Hyperparameter optimization (HPO) can be written as a bi-level problem, where the optimal parameters  $\mathbf{W}^*$  (i.e. NN weights) on the training set depend on the hyperparameters  $\lambda$ .

$$\lambda^* = \arg \min_{\lambda} \mathcal{L}_{\text{val}}(\lambda; \mathbf{W}^*) \quad \text{s.t.} \quad \mathbf{W}^* = \arg \min_{\mathbf{W}} \mathcal{L}_{\text{trn}}(\mathbf{W}; \lambda) \quad (1)$$

where  $\mathcal{L}_{\text{val}}$  and  $\mathcal{L}_{\text{trn}}$  denote the validation and training losses, respectively. There is a body of literature on HPO for supervised settings Bergstra & Bengio (2012); Li et al. (2017); Shahriari et al. (2016), and several for supervised OD that use labeled outliers for validation Li et al. (2021; 2020); Lai et al. (2021). While supervised model selection leverages  $\mathcal{L}_{\text{val}}$ , *unsupervised* OD posits a unique challenge: it does not exhibit labeled hold-out data to evaluate  $\mathcal{L}_{\text{val}}$ . It is unreliable to employ the same  $\mathcal{L}_{\text{trn}}$  loss as  $\mathcal{L}_{\text{val}}$  as models with minimum training loss do not necessarily associate with accurate detection Ding et al. (2022) (e.g. autoencoder with low reconstruction error has likely missed the outliers).

### 1.1 RELATED WORK

Compared to the large body of work on new models for *detection*, prior work on unsupervised OD model *selection* is quite slim. Earlier work proposed intrinsic measures for unsupervised model evaluation, based on input data and output outlier scores Goix (2016); Marques et al. (2015), or based on consensus among various models Duan et al. (2020); Lin et al. (2020), as well as properties of the learned weights Martin et al. (2021). As recent meta-analyses have shown, intrinsic measures are quite noisy; only slightly and often no better than random Ma et al. (2023). Moreover, they suffer from exponential compute cost in large HP spaces as they require training numerous candidate models for evaluation. More recent solutions leverage meta-learning by selecting a model for a new

dataset based on how they perform on similar historical datasets Zhao et al. (2021; 2022); Jiang et al. (2023). They are computationally slow in large HP spaces and cannot handle any continuous HPs. Our proposed HYPER also leverages meta-learning, while it is more efficient with hypernetworks, and is more effective by handling continuous HPs with a well-designed performance estimator function. In experiments, we compare all the aforementioned baselines (see Fig. 5 and Table C2).

## 1.2 PRESENT WORK

We introduce HYPER and tackle two key challenges with unsupervised DOD model selection: **(Ch1)** lack of supervision, and **(Ch2)** scalability as tempered by the cost of training numerous candidate models. For (Ch1), we employ meta-learning where the main idea is to train a performance estimator function,  $f_{\text{val}}$ , which maps the input data, HPs  $\lambda$ , and output outlier scores corresponding to  $\lambda$  onto detection performance on historical tasks. Note that meta-learning builds on past experience, i.e. historical datasets *with* labels for which detection performance of various models can be evaluated.

Having substituted  $\mathcal{L}_{\text{val}}$  with meta-trained  $f_{\text{val}}$ , one can adopt existing supervised HPO solutions Feurer & Hutter (2019) for model selection on a given/new dataset *without* labels. However, most of those are susceptible to the scalability challenge, as they train each candidate model (with varying  $\lambda$ ) independently from scratch. To address (Ch2) and bypass the expensive process of fully training each candidate separately, we leverage *hypernetworks* (HN). This idea is inspired by the self-tuning networks MacKay et al. (2019), which estimate the best-response function that maps HPs  $\lambda$  onto optimal weights  $\mathbf{W}^*$  through a hypernetwork (HN) parameterized by  $\phi$ , i.e.  $\widehat{\mathbf{W}}_{\phi}(\lambda) \approx \mathbf{W}^*$ .

A single auxiliary HN model can generate the weights of the main DOD model with varying HPs. In essence, it learns how the model weights should change or *respond* to the changes in HPs (hence the name, best-response). As one of our key contributions, besides the regularization HPs (e.g., dropout rate) that STN MacKay et al. (2019) considered, we propose a novel HN model that can also respond to *architectural* HPs; including depth and width for DOD models with fully-connected layers.

In a nutshell, HYPER jointly optimizes the HPs  $\lambda$  and the HN parameters  $\phi$  in an alternating fashion. Over iterations, it alternates between (1) **HN-training** that updates  $\phi$  to approximate the best-response in a local neighborhood around the current hyperparameters via  $\mathcal{L}_{\text{tm}}$ , and then the (2) **HPO** step that updates  $\lambda$  in a gradient-free fashion by estimating detection performance through  $f_{\text{val}}$  of a large set of candidate  $\lambda$ 's sampled from the same neighborhood, using the corresponding approximate best-response, i.e. the HN-generated weights.

Our HN model offers dramatic speed-ups, by dynamically generating weights for many candidate models with varying HPs, as compared to freely training these candidates separately. Therefore, we also utilize HNs during meta-training, where we replace independently training many models on each historical dataset with a single HN. HN's ability to produce weights for HPs unseen during HN-training also makes it an attractive design choice for continuous-space HPO.

**Summary of contributions.** HYPER addresses the model selection problem for *unsupervised* deep-NN based outlier detection (DOD), applicable to any DOD model, and is *efficient* despite the large continuous HP space including regularization as well as NN architecture HPs. HYPER's notable efficiency is thanks to our proposed hypernetwork (HN) model that generates DOD model parameters (i.e. NN weights) in response to changes in the HPs—in effect, we leverage a single HN acting like many DOD models. Further, it offers unsupervised tuning thanks to a performance estimator function trained via meta-learning on historical tasks, which also benefits from the efficiency of our HN.

We compare HYPER against 8 baselines through extensive experiments on 35 benchmark datasets. HYPER achieves the best performance-runtime trade-off, and selects models with statistically better detection than all baselines (see Fig. 5). Notably, it offers 30% performance improvement over the default HPs, and 7% improvement with  $4.2\times$  speed-up over the latest method ELECT Zhao et al. (2022) (see Table C2 in Appx.), thus establishing the new state-of-the-art.

**Accessibility and Reproducibility.** See repo. <https://github.com/inreview23/HYPER>.

## 2 PRELIMINARIES

### 2.1 PROBLEM AND CHALLENGES

The sensitivity of outlier detectors to hyperparameter (HP) choices is well studied Campos et al. (2016a). Deep-NN models are no exception, in fact are even more sensitive as they have many more HPs Ding et al. (2022). In fact, it would not be an overstatement to point to unsupervised outlier

model selection as the primary obstacle to unlocking the ground-breaking potential of deep-NNs for OD. This is exactly the problem we consider in this work.

**Problem 1 (Unsupervised Deep Outlier Model Selection (UDOMS))** Given a new input dataset (i.e., detection task<sup>1</sup>)  $\mathcal{D}_{test} = (\mathbf{X}_{test}, \emptyset)$  without any labels, and a deep-NN based OD model  $M$ ; Output model parameters corresponding to a selected hyperparameter configuration  $\lambda \in \Lambda$  to employ on  $\mathbf{X}_{test}$  to maximize  $M$ 's detection performance.

**Desiderata.** Our work tackles two key challenges that arise when tuning OD models with deep NNs: (1) *Validation without supervision*, and (2) *Large HP/model space*.

First, unsupervised OD does not exhibit any labels and therefore model selection via validating detection performance on labeled hold-out data is not possible. While model parameters can be estimated end-to-end through unsupervised training losses, such as reconstruction error or one-class losses, one cannot reliably use the same loss as the validation loss; in fact, low error could easily associate with poor detection since most DOD models use point-wise errors as their outlier scores.

Second, model tuning for the modern OD techniques based on deep-NNs with many HPs is a much larger scale ball-game than that for their shallow counterparts with only 1-2 HPs. This is both due to their (i) large number of HPs and also (ii) longer training time they typically demand. In other words, the model space that is exponential in the number of HPs and the costly training of individual models necessitate efficient strategies for effective search.

## 2.2 HYPERNETWORKS

We approach the challenge of efficiently searching the HP space with the help of hypernetworks, for which we provide necessary background in this section.

In principle, a hypernetwork (HN) is a (usually small) network generating weights (i.e. parameters) for another larger network (called the main network) Ha et al. (2017). As such, one can think of the HN as a “model compression” tool for training, one that requires fewer learnable parameters. HNs have been used mainly for parameter-efficient training of large models with diverse architectures MacKay et al. (2019), Brock et al. (2018), Zhang et al. (2019), Knyazev et al. (2021) as well as for diverse learning tasks Przewiężlikowski et al. (2022), von Oswald et al. (2020).

Historically, HNs can be seen as the birth-child of the “fast-weights” concept by Schmidhuber (1992), where one network produces *context-dependent weight changes* for another network. The *context*, in our as well as several other work Brock et al. (2018); MacKay et al. (2019), is the *hyperparameters* (HPs).<sup>2</sup> That is, we train a HN model that takes the (encoding of) HPs of the (main) DOD model as input, and produces *HP-dependent* weight changes for the DOD model that we aim to tune. Training a *single* HN that can generate weights for the (main) DOD model for *varying* HPs can effectively bypass the cost of fully-training those candidate models separately. This offers dramatic speed up during model search where one trained (HN) model acts like multiple trained (DOD) models.

## 3 PROPOSED FRAMEWORK FOR UDOMS: HYPER

**Overview.** HYPER consists of two phases (see Fig. 1): (§3.1) offline meta-training over historical datasets, and (§3.2) online model selection for the test dataset. First we train the performance estimator  $f_{val}$  offline, which allows us to predict model performance on the test dataset without relying on any labels. Given a new task online, we alternate between training our HN to efficiently generate model weights for varying HPs around a local HP neighborhood, and refining the best HPs at the current iteration based on  $f_{val}$ 's predictions for many locally sampled HPs.

We present the offline and online phases in detail as follows, and later in §4 describe the specifics of our proposed HN, which is employed in both phases for efficient model training.

### 3.1 META-TRAINING (OFFLINE ON HISTORICAL DATASETS)

Through meta-learning the goal is to transfer supervision from labeled historical datasets,  $\mathcal{D}_{train} = \{\mathcal{D}_i = (\mathbf{X}_i, \mathbf{y}_i)\}_{i=1}^n$ , to enable model performance evaluation on a new dataset without labels. To that end, we train  $f_{val}$  to map {data\_embedding, model\_embedding, HP\_config} onto

<sup>1</sup>Throughout text, we use outlier detection *task* and *dataset* interchangeably.

<sup>2</sup>We remark that *hypernetworks* need not depend in any form to *hyperparameters*, as the naming similarity may (incorrectly) suggest. In fact, earlier work used HNs for model compression rather than model/HP selection.

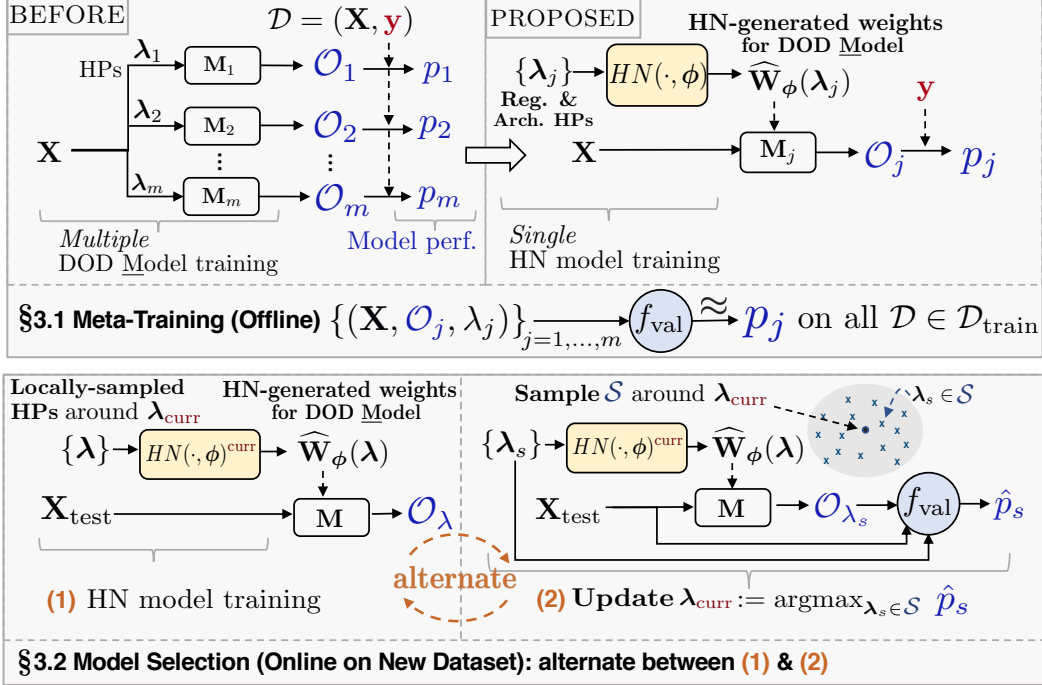

**Figure 1:** HYPER framework illustrated. (top) Offline meta-training of performance estimator  $f_{\text{val}}$  (depicted in  ) on labeled historical datasets  $\mathcal{D}_{\text{train}}$  (§3.1); (bottom) Online model selection on a new unlabeled dataset  $\mathbf{X}_{\text{test}}$  (§3.2). We accelerate both meta-training and model selection using hypernetworks (HN) (depicted in  ; §4).

the corresponding model performance across  $\mathcal{D}_{\text{train}}$ .  $f_{\text{val}}$  is then employed to predict performance solely from characteristics of (1) the input data, (2) the trained model, and (3) the HP values.

**Data Embedding.** Datasets may have different feature and sample sizes (Appx. §C.1), which makes it challenging to learn dataset embeddings. To address this, we use feature hashing Weinberger et al. (2009),  $\psi(\cdot)$ , to project a dataset to a  $k$ -dimensional unified feature space. Then, we train a feature extractor  $h(\cdot)$ , a fully connected neural network, to map hashed samples to their corresponding outlier labels, i.e.  $h: \psi(\mathbf{X}) \mapsto \mathbf{y}$ , where  $(\mathbf{X}, \mathbf{y})$  denotes a historical dataset with labels. In effect, embeddings by  $h(\cdot)$  is expected to capture outlying characteristics of datasets. Finally, we use max-pooling to aggregate sample-wise representations into dataset-wise embeddings by  $\text{pool}\{h(\psi(\mathbf{X}))\}$ .

**Model Embedding.** To represent a trained DOD model with HP-config.  $\lambda$ , we train a neural network  $g(\cdot)$  that maps its set of output outlier scores onto detection performance, i.e.  $g: \mathcal{O}_{\lambda} \mapsto p$ . To handle set-size variability of outlier scores (due to different size datasets), we employ DeepSet Zaheer et al. (2017) for  $g(\cdot)$ , and use the pooling layer’s output as the model embedding by  $\text{pool}\{g(\mathcal{O}_{\lambda})\}$ .

**Training an Effective and Efficient  $f_{\text{val}}$  for Validation without Supervision.** Given a DOD algorithm  $M$  for UDOMS, let  $M_j$  denote the model with HP configuration  $\lambda_j$  from the set  $\lambda_{\text{meta}} = \{\lambda_1, \dots, \lambda_m\} \in \Lambda$ . HYPER uses  $\mathcal{D}_{\text{train}}$  to compute (1) *historical outlier scores*  $\mathcal{O}_{i,j}$ , as output by each  $M_j$  on each  $\mathcal{D}_i \in \mathcal{D}_{\text{train}}$ ; and the corresponding (2) *historical performance*  $p_{i,j}$ , denoting  $M_j$ ’s detection performance (e.g. AUROC) on  $\mathcal{D}_i$ , calculated based on the scores  $\mathcal{O}_{i,j}$  and the labels  $\mathbf{y}_i$ .

**Regression.** As shown in Fig. 1 (top), the idea of  $f_{\text{val}}$  is to learn a mapping (e.g. lightGBM Ke et al. (2017) or any other regressor) from (1) input data embedding, (2) model embedding (based on model output, i.e. outlier scores), and (3) given HP configuration onto the corresponding detection performance across  $n$  historical datasets and  $m$  models (i.e. configurations). Specifically,

$$f_{\text{val}}: \underbrace{\{\text{pool}\{h(\psi(\mathbf{X}_i))\}\}}_{\text{data embed.}} \underbrace{\{\text{pool}\{g(\mathcal{O}_{i,j})\}\}}_{\text{model embed.}} \underbrace{\{\lambda_j\}}_{\text{HPs}} \mapsto p_{i,j}, \quad i \in \{1, \dots, n\}, j \in \{1, \dots, m\}. \quad (2)$$

Further details on  $f_{\text{val}}$  are given in Appx. §A. Notably, provided with the functions  $\psi(\cdot)$ ,  $h(\cdot)$ ,  $g(\cdot)$ , and the trained  $f_{\text{val}}$ , we can predict a given model’s performance on a new task *without* any labels.

**Speed-up.** Obtaining model embeddings requires the outlier scores and hence training the DOD model for each HP configuration, which can be computationally expensive (see Fig. 1 (top, left)). To address this efficiency issue, we train our proposed HN (details presented in §4) only *once per dataset* across  $m$  different HP configurations, which generates the weights and outlier scores for all models, significantly speeding up the meta-training phase (see Fig. 1 (top, right)).

**Algorithm 1** HYPER: Online Model Selection

**Input:** test dataset  $\mathcal{D}_{\text{test}} = (\mathbf{X}_{\text{test}}, \emptyset)$  HN parameters  $\phi$ , HN learning rate  $\alpha$ , HN loss function  $\mathcal{L}_{\text{hn}}(\cdot)$ , performance estimator  $f_{\text{val}}$ , HN (re-)training epochs  $T$ , validation objective  $\mathcal{G}(\cdot)$ , patience  $\rho$

**Output:** optimized HP configuration  $\lambda^*$  for the test dataset

---

```

1: Initialize  $\lambda_{\text{curr}}$  and  $\sigma_{\text{curr}}$ ; set current best HP  $\lambda^* := \lambda_{\text{curr}}$ ; sampled set of HPs  $\mathcal{S} := \emptyset$ 
2: while patience criterion  $\rho$  is not met do
3:   for  $t = 1, \dots, T$  do
4:      $\epsilon \sim p(\epsilon | \sigma_{\text{curr}})$  ▶ sample local HP perturbations around current  $\lambda_{\text{curr}}$ 
5:      $\phi \leftarrow \alpha \frac{\partial}{\partial \phi} \mathcal{L}_{\text{hn}}(\lambda_{\text{curr}} + \epsilon, \widehat{\mathbf{W}}_{\phi}(\lambda_{\text{curr}} + \epsilon))$  ▶ train the HN with the sampled local HPs
6:      $\mathcal{S} := \mathcal{S} \cup (\lambda_{\text{curr}} + \epsilon)$  ▶ save locally sampled HPs
7:   end for
8:    $\lambda_{\text{curr}} \leftarrow \operatorname{argmax}_{\lambda \in \Lambda} \mathcal{G}(\lambda, \sigma_{\text{curr}}, \widehat{\mathbf{W}}_{\phi}(\lambda + \epsilon))$  ▶ update  $\lambda_{\text{curr}}$  by Eq. (4)
9:    $\sigma_{\text{curr}} \leftarrow \operatorname{argmax}_{\sigma} \mathcal{G}(\lambda_{\text{curr}}, \sigma, \widehat{\mathbf{W}}_{\phi}(\lambda_{\text{curr}} + \epsilon))$  ▶ update  $\sigma_{\text{curr}}$  by Eq. (4)
10: end while
11: Output the best HP  $\lambda^* \approx \operatorname{argmax}_{\lambda \in \mathcal{S}} f_{\text{val}}(\mathbf{X}_{\text{test}}, \widehat{\mathbf{W}}_{\phi}(\lambda), \lambda)$  ▶ Eq. (5)

```

---

## 3.2 MODEL SELECTION (ONLINE ON NEW DATASET)

**Model selection via performance estimator.** Given our meta-trained  $f_{\text{val}}$ , we can train DOD models with randomly sampled HPs on the test dataset to obtain outlier scores, and then select the one with the highest predicted performance by  $f_{\text{val}}$ , that is,  $\operatorname{argmax}_{\lambda \in \Lambda} f_{\text{val}}(\mathbf{X}_{\text{test}}, \mathcal{O}_{\text{test}, \lambda}, \lambda)$ .

Training OD models from scratch for each HP can be computationally expensive. To speed this up, we propose to build a HN to generate model weights and subsequently the outlier scores for randomly sampled HPs. Parameterized by  $\phi$ , the HN maps a given HP configuration  $\lambda_j$  to the weights  $\widehat{\mathbf{W}}_{\phi}(\lambda_j) := \text{HN}(\lambda_j; \phi)$ , which are effectively the predicted parameters of the DOD model under HP configuration  $\lambda_j$ . (See details in §4.) As the DOD model weights also dictate the output outlier scores  $\mathcal{O}_{\lambda}$ , we abuse notation and use them interchangeably as input to  $f_{\text{val}}$  in this section.

**Training local HN iteratively and adaptively.** We propose to iteratively train our HN over *locally* selected HPs, since training a “global HN” to predict weights across the entire  $\Lambda$  and over unseen  $\lambda$  is a challenging task especially for large model spaces MacKay et al. (2019), impacting the quality of model selection. We design HYPER to jointly optimize the HPs  $\lambda$  and the (*local*) HN parameters  $\phi$  in an alternating fashion; as shown in Fig. 1 (bottom) and Algo. 1. It alternates between:

1. **HN-training** that updates HN parameters  $\phi$  to approximate the best-response in a local neighborhood around the current hyperparameters  $\lambda_{\text{curr}}$  via  $\mathcal{L}_{\text{hn}}$ , and
2. **HPOpt** that updates  $\lambda_{\text{curr}}$  in a gradient-free fashion by estimating detection performance through  $f_{\text{val}}$  of a large set  $\mathcal{S}$  of candidate  $\lambda$ ’s sampled from the same neighborhood, using the corresponding approximate best-response, i.e. the HN-generated weights,  $\widehat{\mathbf{W}}_{\phi}(\lambda)$ .

To dynamically control the sampling range around  $\lambda_{\text{curr}}$ , we use a factorized Gaussian with standard deviation  $\sigma$  to generate local HP perturbations  $p(\epsilon | \sigma)$ .  $\sigma_{\text{curr}}$  is used during HN-training for sampling local HPs and gets updated during HPOpt at each iteration.

**Updating  $\lambda_{\text{curr}}$  and  $\sigma_{\text{curr}}$ .** HYPER iteratively explores promising HPs and the corresponding sampling range. To update  $\lambda_{\text{curr}}$  and  $\sigma_{\text{curr}}$ , we maximize the following objective.

$$\underbrace{\mathbb{E}_{\epsilon \sim p(\epsilon | \sigma)} [f_{\text{val}}(\mathbf{X}_{\text{test}}, \widehat{\mathbf{W}}_{\phi}(\lambda + \epsilon), \lambda + \epsilon)]}_{\text{update } \lambda_{\text{curr}} \text{ to a better model/HPs w/ high expectation}} + \underbrace{\tau \mathbb{H}(p(\epsilon | \sigma))}_{\text{sampling range around } \lambda_{\text{curr}}} \quad (3)$$

The objective consists of two terms. The first term emphasizes selecting the next model/HP configuration with high expected performance, aiming to improve the overall model performance. The second term measures the uncertainty of the sampling factor, quantified with Shannon’s entropy  $\mathbb{H}$ . A higher entropy value indicates a less localized sampling, allowing for more exploration. The objective is to find an HP configuration that can achieve high expected performance, within a reasonably local region to contain a good model, that is also local enough for the HN to be able to effectively learn the best-response. If the sampling factor  $\sigma$  is too small, it limits the exploration of the next HP configuration and training of the HN, potentially missing out on better-performing options. Conversely, if  $\sigma$  is too large, it may lead to inaccuracies in the HN’s generated weights, compromising the accuracy of the first term. The balance factor  $\tau$  controls the trade-off between the two terms.

We approximate the expectation term in Eq. (3) by the empirical mean of predicted performances through  $V$  number of sampled perturbations around  $\lambda$ . Then, we define our validation objective  $\mathcal{G}$  as

$$\mathcal{G}(\lambda, \sigma, \widehat{\mathbf{W}}_\phi) = \frac{1}{V} \sum_{i=1}^V f_{\text{val}}(\mathbf{X}_{\text{test}}, \widehat{\mathbf{W}}_\phi(\lambda + \epsilon_i), \lambda + \epsilon_i) + \tau \mathbb{H}(p(\epsilon|\sigma)). \quad (4)$$

In each iteration of the HP configuration update, we first fix  $\sigma_{\text{curr}}$  and find the HP configuration with the highest value of Eq. (4). Specifically, we sample  $V_\lambda$  local configurations around  $\lambda_{\text{curr}}$ , i.e.,  $\lambda_{\text{curr}} + \epsilon_i|\sigma_{\text{curr}}$  for  $i \in 1, \dots, V_\lambda$ . After  $\lambda_{\text{curr}}$  is updated, we fix it and update the sampling factor  $\sigma_{\text{curr}}$  by Eq. (4) based on  $V_\sigma$  samples of  $\sigma$ . To ensure encountering a good HP configuration, we set  $V_\lambda$  and  $V_\sigma$  to be a large number, e.g. 500. (see specific settings in Appx. §C.2.)

**Selecting the Best Model/HP  $\lambda^*$ .** We employ  $f_{\text{val}}$  to choose the best HP  $\lambda^*$  from all the locally sampled HPs  $\mathcal{S}$  during the HN training. Note that HYPER directly uses the HN-generated weights  $\widehat{\mathbf{W}}_\phi(\lambda)$  for fast computation, without the need to build any model for evaluating by  $f_{\text{val}}$ . That is,

$$\lambda^* \approx \operatorname{argmax}_{\lambda \in \mathcal{S}} f_{\text{val}}(\mathbf{X}_{\text{test}}, \widehat{\mathbf{W}}_\phi(\lambda), \lambda). \quad (5)$$

**Initialization and Convergence.** We initialize  $\lambda_{\text{curr}}$  and  $\sigma_{\text{curr}}$  with the globally best values across historical datasets. We consider HYPER as converged if the highest predicted performance by  $f_{\text{val}}$  does not change in  $\rho$  consecutive iterations. A larger  $\rho$ , referred as ‘‘patience’’, requires more iterations to converge yet likely yields better results. Note that  $\rho$  can be decided by cross-validation on historical datasets during meta-training. See Appx. §C.3 for analysis of initialization and patience.

#### 4 PROPOSED HYPERNETWORK FOR SPEED UP – TRAIN ONE, GET MANY

To tackle the challenge of model-building efficiency, we design hypernetworks (HN) that can efficiently train OD models with different hyperparameter configurations. A hypernetwork (HN) is a network generating weights (i.e. parameters) for another network (in our case, the DOD model) Ha et al. (2017). Our input to HN,  $\lambda \in \Lambda$ , breaks down into two components as  $\lambda = [\lambda_{\text{reg}}, \lambda_{\text{arch}}]$ , corresponding to regularization HPs (e.g. dropout, weight decay) and architectural HPs.

Our HN resolves three challenges: **(Ch.I)** its fixed-size output  $\widehat{\mathbf{W}}_\phi$  must be able to adjust to different architectural shapes, **(Ch.II)**  $\widehat{\mathbf{W}}_\phi(\lambda)$  should output sufficiently diverse weights in response to varying  $\lambda$  inputs, and **(Ch.III)** training HN should be more efficient than training individual DOD models.

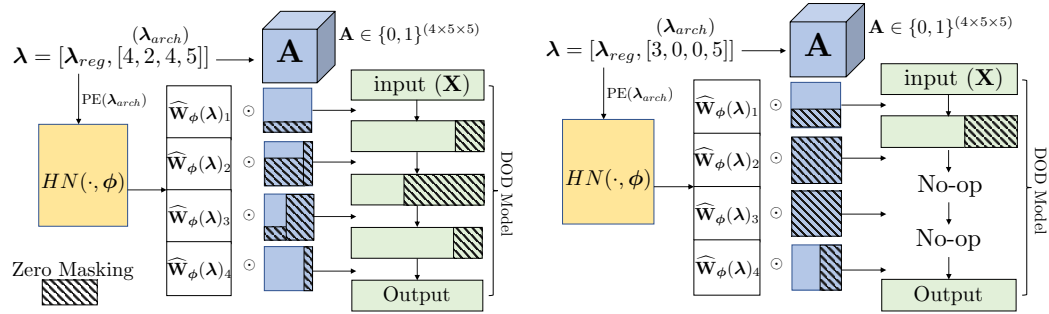

**Figure 2:** Illustration of the proposed HN. Left: HN generates weights for a 4-layer AE, with layer widths equal to [4, 2, 4, 5]. Weights  $\widehat{\mathbf{W}}_\phi$  is fed into the DOD model, while hidden layers’ dimensions are shrunk by the masking  $\mathbf{A}$ . Right: HN generates weights for a 2-layer AE, with layer widths equal to [3, 5].  $\lambda_{\text{arch}}$  is padded as [3, 0, 0, 5], and the architecture masking at the second and third layer are set to all zeros. When  $\widehat{\mathbf{W}}_\phi$  is fed into the DOD model, zero masking enables the No-op, in effect shrinking the DOD model from 4 layers to 2 layers.

**Architecture Masking for (Ch.I)** To allow HN output to adapt to various architectures, we let  $\widehat{\mathbf{W}}_\phi$ ’s size be equal to size of the largest architecture in model space  $\Lambda$ . Then for each  $\lambda_{\text{arch}}$ , we build a corresponding architecture masking  $\mathbf{A}$  and feed the  $\mathbf{A}$ -masked version of  $\widehat{\mathbf{W}}_\phi$  to the DOD model. In other words, our  $\widehat{\mathbf{W}}_\phi$  handles all smaller architectures by properly padding zeros on the  $\widehat{\mathbf{W}}_\phi$ .

Taking DOD models built upon MLPs as an example (see Fig. 2), we make HN output  $\widehat{\mathbf{W}}_\phi \in \mathbb{R}^{(D \times W \times W)}$ , where  $D$  and  $W$  denote the maximum depth and maximum layer width from  $\Lambda$ . Assume  $\lambda_{\text{arch}}$  contains the abstraction of a smaller architecture; e.g.,  $L$  layers with corresponding

width values  $\{W_1, W_2, \dots, W_L\}$  all less than or equal to  $W$ . Then  $\lambda_{arch} \in \mathbb{N}^D$  is given as

$$\lambda_{arch} = [W_1, W_2, \dots, W_{\lfloor L/2 \rfloor}, \underbrace{0, \dots, 0}_{(D-L) \text{ zeros}}, W_{\lfloor L/2 \rfloor + 1}, \dots, W_{(L-1)}, W_L].$$

The architecture masking  $\mathbf{A} \in \{0, 1\}^{(D \times W \times W)}$  is constructed as the following:

$$\begin{cases} \mathbf{A}_{[l, 0: \lambda_{arch}[0], :]} = 1 & , \text{ if } l = 0 \\ \mathbf{A}_{[l, 0: \lambda_{arch}[l], 0: \lambda_{arch}[l-z]]} = 1 & , \text{ otherwise} \end{cases} \quad (6)$$

where  $\lambda_{arch}[l-z]$  is the last non-zero entry in  $\lambda_{arch}[0:l]$  (e.g., for  $\lambda_{arch} = [5, 3, 0, 0, 3]$  and  $l = 4$ , the last nonzero entry is  $\lambda_{arch}[1]$  where  $z = 3$ ). Then,  $l$ 'th layer weights are multiplied by masking as  $\mathbf{A}_{[l, :, :]} \odot \widehat{\mathbf{W}}_{\phi, l}$ , where non-zero entries are of shrunk dimensions. If  $\mathbf{A}_{[l, :, :]}$  contains only zeros, layer weights become all zeros, representing a "No-op" (and DOD model ignores this layer).

**Other Architectures.** We find that this masking works well with linear autoencoders with a "hour-glass" structure, in which case the maximum width  $W$  is the input dimension. For networks built with convolutions, on the other hand, the architecture masking becomes  $\mathbf{A} \in \{0, 1\}^{D \times M_{ch} \times M_{ch} \times M_k \times M_k}$ , where  $D$ ,  $M_{ch}$ ,  $M_k$  represent maximum number of layers, channels, and kernel size specified in  $\Lambda$ , respectively. Here we abbreviate the masking procedure: Channels, similar to the previously discussed widths, are padded by masking out the second dimension of the  $\mathbf{A}$  tensor. When we need a smaller kernel size  $k \leq M_k$  at layer  $l$ , the corresponding  $\mathbf{A}_{[l, :, :, :]}$  pads zeros around the size  $M_{ch} \times k \times k$  center. The masked weights  $\mathbf{A}_{[l, :, :, :]} \odot \widehat{\mathbf{W}}_{\phi, l}$  are equivalent to obtaining smaller-size kernel weights, as shown in Wang et al. (2020). Further details of masking and constructing the  $\lambda_{arch}$  input for other architectures can be found in Appx. §B.

**Diverse Weight Generation for (Ch.II)** While HN is a universal function approximator in theory, it may not generalize well to offer good approximations for many unseen architectures ], especially given that the number of  $\lambda$ 's during training is limited. When there is only little variation between two inputs  $\lambda_j$  and  $\lambda_{j'}$ , the HN provides more similar weights  $\widehat{\mathbf{W}}_{\phi}(\lambda_j)$  and  $\widehat{\mathbf{W}}_{\phi}(\lambda_{j'})$ , since the weights are generated from the same HN where implicit weight sharing occurs.

We employ two ideas toward enabling the HN to generate more expressive weights in response to changes in  $\lambda_{arch}$ . First is to inject more variation within its input space where, instead of directly feeding in  $\lambda_{arch}$ , we input the positional encoding of each element in  $\lambda_{arch}$ . Positional encoding Vaswani et al. (2017) transforms each scalar element into a vector embedding, which encodes more granular information, especially when  $\lambda_{arch}$  contains zeros representing a shallower sub-architecture. Second idea is to employ a scheduled training strategy of the HN as it produces weights for both shallow and deep architectures. During HN training, we train with  $\lambda$  associated with deeper architectures first, and later  $\lambda$  for shallower architectures are trained jointly with deeper architectures. Our scheduled training alleviates the problem of imbalanced weight sharing, where weights associated with shallower layers are updated more frequently as those are used by more number of architectures. Fig. 3 (best in color) illustrates how the training losses change for individual architectures during the HN's scheduled training.

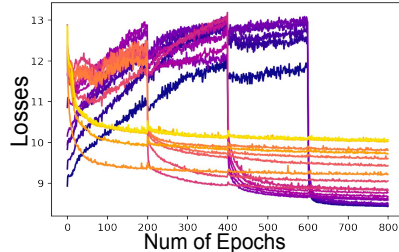

**Figure 3:** Loss of individual models during scheduled training. Lighter colors depict loss curves of deeper architectures, which enter training early.

**Batchwise Training for (Ch.III)** Like other NNs, HN allows for several inputs  $\{\lambda_j\}_{j=1}^m$  synchronously and outputs  $\{\widehat{\mathbf{W}}_{\phi}(\lambda_j)\}_{j=1}^m$ . To speed up training, we batch the input at each forward step with a set of different architectures  $\mathcal{M}$  to obtain  $\{\lambda_{arch, j}\}_{j \in \mathcal{M}}$ , which pair with a sampled regularization HP configuration,  $\lambda_{reg, s}$ . Given dataset  $\mathcal{D}$ , the HN loss for one pass is calculated as

$$\mathcal{L}_{hn} = \sum_{\mathbf{x} \in \mathcal{D}} \sum_{j \in \mathcal{M}} \mathcal{L}_{tm}(\widehat{\mathbf{W}}_{\phi}([\lambda_{arch, j}, \lambda_{reg, s}]), \mathbf{x}). \quad (7)$$

In summary, our HN mimics fast DOD model building across different HP configurations. This offers two advantages: (i) training many different HPs jointly in meta-training and (ii) fast DOD model parameter generation during online model search. Notably, our HN can tune a wider range of HPs including model architecture, and as shown in §5.2, provides superior results to only tuning  $\lambda_{reg}$ .

## 5 EXPERIMENTS

**Benchmark Data.** We show HYPER’s effectiveness and efficiency with fully connected AutoEncoder (AE) for DOD on tabular data, using a testbed consisting of 35 benchmark datasets from two different public OD repositories; ODDS Rayana (2016) and DAMI Campos et al. (2016b)). See Appx. C.1 for detailed descriptions of the datasets in both repositories.

**Baselines.** We include 8 baselines for comparison ranging from simple to state-of-the-art (SOTA); Appx. Table C2 provides a conceptual comparison of the baselines. Briefly, they are organized as

- (i) *No model selection:* (1) **Default** adopts the default HPs used in the popular OD library PyOD Zhao et al. (2019), (2) **Random** picks an HP randomly (we report expected performance);
- (ii) *Model selection without meta-learning:* (3) **MC** Ma et al. (2023) leverages consensus; and
- (iii) *Model selection by meta-learning:* (4) **Global Best (GB)** selects the best performing model on the historical datasets on average, and SOTA baselines include (5) **ISAC** Kadioglu et al. (2010), (6) **ARGOSMART (AS)** Nikolic et al. (2013), (7) **MetaOD** Zhao et al. (2021), and finally the latest SOTA (8) **ELECT** Zhao et al. (2022).

Baselines (1), (2), and (4)-(7) are zero-shot that do not require any candidate model building during model selection. More detailed descriptions of the baselines are given in Appx. §C.2.

**Evaluation.** We use 5-fold cross-validation to split the train/test datasets; that is, each time we use 28 datasets as the historical datasets to select models on the remaining 7 datasets. We use the area under the ROC curve to measure detection performance, while it can be substituted with any other measure. As the raw ROC performances are not comparable across datasets with varying difficulty, we report the normalized ROC Rank of an HP/model, ranging from 0 (the best) to 1 (the worst)—i.e., the lower the better. We use the paired Wilcoxon signed rank test Groggel (2000) across all datasets in the testbed to compare two methods. Full performance results on all 35 datasets are in Appx. §C.4.

### 5.1 EXPERIMENT RESULTS

Fig. 4 shows that HYPER **outperforms all baselines with regard to the average ROC Rank on the 35 dataset testbed**. It also strikes a good balance between computation and performance.

In addition, Fig. 5 provides the full performance distribution across all datasets and shows that HYPER is statistically better than all baselines, including SOTA meta-learning based ELECT and MetaOD. Among the zero-shot baselines, Default and Random perform significantly poorly while the meta-learning based GB leads to comparably higher performance. Replicating earlier findings Ma et al. (2023), the internal consensus-based MC, while computationally demanding, is no better than Random.

**HN-powered efficiency enables HYPER to search more broadly.** Fig. 4 shows that HYPER offers significant runtime gains over the SOTA method ELECT, with an average offline training speed-up of  $5.8\times$  and a model selection speed-up of  $4.2\times$ . Unlike ELECT, which requires building OD models from scratch during both offline and online phases, HYPER leverages the HN-generated weights to avoid costly model training for each candidate HP.

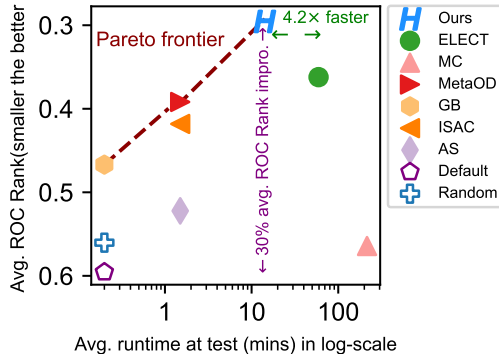

**Figure 4:** Avg. running time (log-scale) vs. avg. model ROC Rank. Meta-learning methods are depicted with solid markers. Pareto frontier (red dashed line) shows the best methods under different time budgets. HYPER outperforms all with reasonable computational demand.

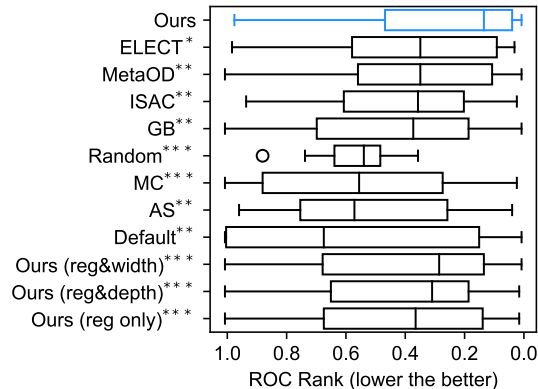

**Figure 5:** Distribution of ROC Rank across datasets. HYPER achieves the best performance among all. Bottom three bars depict HYPER’s variants that do not fully tune architectural HPs (for ablation). Paired significance test results are depicted as \*significance at 0.1, \*\* at 0.01, \*\*\* at 0.001. See  $p$ -values in Appx. Table C3.



Moreover, HYPER can search over a broader range of the HP space thanks to the lower model training cost by HN. This contributes to its effectiveness, yielding 7% improvement in avg. ROC Rank over ELECT and 10% improvement over the latest meta-learning baseline MetaOD (see Table C2 Appx.).

**Meta-learning methods achieve the best performance at different budgets.** Fig. 4 shows that the best performers at different time budgets are global best (GB), MetaOD, and HYPER, which are all on the Pareto frontier. In contrast, simple no-model-selection approaches, i.e., Random and Default, are among the lowest performing methods. Based on Table C2, HYPER achieves respectively 20% and 30% improvements in avg. ROC Rank over Random picking and Default HPs in PyOD Zhao et al. (2019), a widely used open-source OD library. Although meta-learning entails additional (offline) training time, it is to amortize across multiple future model selection tasks in the long run.

## 5.2 ABLATION STUDIES (SEE OTHERS IN APPX. §C.3)

**Benefit of Tuning Architectural HPs via HN.** HYPER tackles the challenging task of accommodating architectural HPs. Through ablations, we study the benefit of our novel HN design, as presented in §4, which can generate DOD model weights in response to changes in architectural HPs. Bottom three bars of Fig. 5 show the performances of three HYPER variants across datasets. The proposed HYPER (with median ROC Rank = 0.1349) outperforms all these variants significantly (with  $p < 0.001$ ), namely, *only tuning regularization and width* (median ROC Rank = 0.2857), *only tuning regularization and depth* (median ROC Rank = 0.3095), and *only tuning regularization* (median ROC Rank = 0.3650). By extending its search for both neural network depth *and* width, HYPER explores a larger model space that helps find better-performing model configurations.

### HP Schedules over Iterations.

In Fig. 6, we more closely analyze how the HP values change over HYPER iterations on spamspace, where we compare between (top) only tuning the reg. HPs, namely the dropout and weight decay rates, while fixing model depth and width (i.e., shrinkage rate) and (bottom) tuning all HPs including both reg. and architectural HPs. Bottom figures show that depth remains fixed at 4, shrinkage rate increases from 1 to 2.25 (i.e., width gets reduced), while dropout and weight decay reduce to 0.2, and 0.05 respectively; in other words, overall model capacity is reduced relative to initialization. In contrast, top figures show that when model depth and width are fixed, regularization HPs compensate more to regulate the model capacity, with a larger dropout rate at 0.4 and larger weight decay at 0.08, achieving ROC rank of only 0.3227 (top) in contrast to proposed HYPER’s 0.0555 (bottom). This comparison showcases the merit of HYPER which adjusts model complexity more flexibly by being able to accommodate a larger model space.

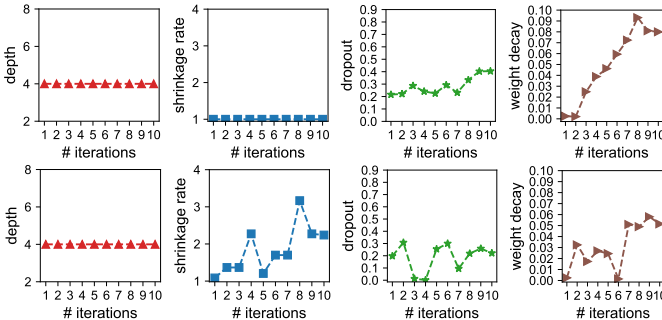

**Figure 6:** Trace of HP schedules over HYPER iterations on spamspace: (top) tuning only regularization HPs; (bottom) tuning both regularization and architectural HPs (proposed). When architecture is fixed, reg. HPs incur more changes in magnitude and reach larger values to adjust model complexity. HYPER tunes complexity more flexibly by also accommodating architectural HPs.

## 6 CONCLUSION

We introduced HYPER, a new framework for unsupervised deep outlier model selection. HYPER tackles two key challenges in this setting: validation in the absence of labels and efficient search of the large hyperparameter (HP)/model space. To that end, it uses meta-learning to train a performance estimator  $f_{\text{val}}$  on historical datasets to effectively predict model performance on a new task without labels. To speed up search, it utilizes a novel hypernetwork (HN) design that generates weights for the detection model with varying HPs including its architecture, and achieves significant efficiency gains over individually training the candidate models. Experiments on a testbed of 35 benchmark datasets showed that HYPER significantly outperforms all 8 baselines, establishing the new state-of-the-art.

We also discuss limitations and possible extensions of HYPER: Future work can aim to design a better  $f_{\text{val}}$  estimator, e.g. by improving dataset and model representations; explore other HP optimization strategies for search, which was not our main focus; and develop other HN designs with lower memory requirement as our focus has not been a small HN that also provides model compression.

## REFERENCES

- James Bergstra and Yoshua Bengio. Random search for hyper-parameter optimization. *J. Mach. Learn. Res.*, 13:281–305, 2012. URL <http://dblp.uni-trier.de/db/journals/jmlr/jmlr13.html#BergstraB12>.
- Andrew Brock, Theodore Lim, James M. Ritchie, and Nick Weston. Smash: One-shot model architecture search through hypernetworks. In *ICLR (Poster)*. OpenReview.net, 2018.
- Guilherme Oliveira Campos, Arthur Zimek, Jörg Sander, Ricardo J. G. B. Campello, Barbora Micenková, Erich Schubert, Ira Assent, and Michael E. Houle. On the evaluation of unsupervised outlier detection: measures, datasets, and an empirical study. *Data Min. Knowl. Discov.*, 30(4):891–927, 2016a.
- Guilherme Oliveira Campos, Arthur Zimek, Jörg Sander, Ricardo J. G. B. Campello, Barbora Micenková, Erich Schubert, Ira Assent, and Michael E. Houle. On the evaluation of unsupervised outlier detection. *DAMI*, 30(4):891–927, 2016b.
- Xueying Ding, Lingxiao Zhao, and Leman Akoglu. Hyperparameter sensitivity in deep outlier detection: Analysis and a scalable hyper-ensemble solution. In Alice H. Oh, Alekh Agarwal, Danielle Belgrave, and Kyunghyun Cho (eds.), *Advances in Neural Information Processing Systems*, 2022.
- Sunny Duan, Loic Matthey, Andre Saraiva, Nick Watters, Christopher Burgess, Alexander Lerchner, and Irina Higgins. Unsupervised model selection for variational disentangled representation learning. In *ICLR*. OpenReview.net, 2020. URL <http://dblp.uni-trier.de/db/conf/iclr/iclr2020.html#DuanMSWBLH20>.
- Matthias Feurer and Frank Hutter. Hyperparameter optimization. *Automated machine learning: Methods, systems, challenges*, pp. 3–33, 2019.
- Nicolas Goix. How to evaluate the quality of unsupervised anomaly detection algorithms? *CoRR*, abs/1607.01152, 2016. URL <http://dblp.uni-trier.de/db/journals/corr/corr1607.html#Goix16>.
- David J. Groggel. Practical nonparametric statistics. *Technometrics*, 42(3):317–318, 2000.
- David Ha, Andrew M. Dai, and Quoc V. Le. Hypernetworks. In *ICLR (Poster)*. OpenReview.net, 2017.
- Minqi Jiang, Chaochuan Hou, Ao Zheng, Songqiao Han, Hailiang Huang, Qingsong Wen, Xiyang Hu, and Yue Zhao. Adgym: Design choices for deep anomaly detection. *Advances in Neural Information Processing Systems*, 36, 2023.
- Serdar Kadioglu, Yuri Malitsky, Meinolf Sellmann, and Kevin Tierney. Isac - instance-specific algorithm configuration. In *ECAI*, volume 215, pp. 751–756, 2010.
- Guolin Ke, Qi Meng, Thomas Finley, Taifeng Wang, Wei Chen, Weidong Ma, Qiwei Ye, and Tie-Yan Liu. Lightgbm: A highly efficient gradient boosting decision tree. *Advances in neural information processing systems*, 30, 2017.
- Boris Knyazev, Michal Drozdal, Graham W Taylor, and Adriana Romero Soriano. Parameter prediction for unseen deep architectures. *Advances in Neural Information Processing Systems*, 34:29433–29448, 2021.
- Kwei-Herng Lai, Daochen Zha, Guanchu Wang, Junjie Xu, Yue Zhao, Devesh Kumar, Yile Chen, Purav Zumkhwaka, Minyang Wan, Diego Martinez, and Xia Hu. TODS: an automated time series outlier detection system. In *Thirty-Fifth AAAI Conference on Artificial Intelligence, AAAI 2021, Thirty-Third Conference on Innovative Applications of Artificial Intelligence, IAAI 2021, The Eleventh Symposium on Educational Advances in Artificial Intelligence, EAAI 2021, Virtual Event, February 2-9, 2021*, pp. 16060–16062. AAAI Press, 2021. URL <https://ojs.aaai.org/index.php/AAAI/article/view/18012>.

- Lisha Li, Kevin G. Jamieson, Giulia DeSalvo, Afshin Rostamizadeh, and Ameet Talwalkar. Hyperband: A novel bandit-based approach to hyperparameter optimization. *J. Mach. Learn. Res.*, 18:185:1–185:52, 2017. URL <http://dblp.uni-trier.de/db/journals/jmlr/jmlr18.html#LiJDRT17>.
- Yuening Li, Daochen Zha, Praveen Kumar Venugopal, Na Zou, and Xia Hu. Pyodds: An end-to-end outlier detection system with automated machine learning. In Amal El Fallah Seghrouchni, Gita Sukthankar, Tie-Yan Liu, and Maarten van Steen (eds.), *Companion of The 2020 Web Conference 2020, Taipei, Taiwan, April 20-24, 2020*, pp. 153–157. ACM / IW3C2, 2020. doi: 10.1145/3366424.3383530. URL <https://doi.org/10.1145/3366424.3383530>.
- Yuening Li, Zhengzhang Chen, Daochen Zha, Kaixiong Zhou, Haifeng Jin, Haifeng Chen, and Xia Hu. Autood: Neural architecture search for outlier detection. In *37th IEEE International Conference on Data Engineering, ICDE 2021, Chania, Greece, April 19-22, 2021*, pp. 2117–2122. IEEE, 2021. doi: 10.1109/ICDE51399.2021.00210. URL <https://doi.org/10.1109/ICDE51399.2021.00210>.
- Zinan Lin, Kiran Thekumparampil, Giulia Fanti, and Sewoong Oh. InfoGAN-CR and ModelCentrality: Self-supervised model training and selection for disentangling GANs. In *International Conference on Machine Learning*, pp. 6127–6139. PMLR, 2020.
- Martin Q Ma, Yue Zhao, Xiaorong Zhang, and Leman Akoglu. The need for unsupervised outlier model selection: A review and evaluation of internal evaluation strategies. *ACM SIGKDD Explorations Newsletter*, 25(1), 2023.
- Xiaoxiao Ma, Jia Wu, Shan Xue, Jian Yang, Chuan Zhou, Quan Z Sheng, Hui Xiong, and Leman Akoglu. A comprehensive survey on graph anomaly detection with deep learning. *IEEE Transactions on Knowledge and Data Engineering*, 2021.
- Matthew MacKay, Paul Vicol, Jonathan Lorraine, David Duvenaud, and Roger B. Grosse. Self-tuning networks: Bilevel optimization of hyperparameters using structured best-response functions. In *ICLR (Poster)*. OpenReview.net, 2019.
- Henrique O. Marques, Ricardo J. G. B. Campello, Arthur Zimek, and Jörg Sander. On the internal evaluation of unsupervised outlier detection. In *SSDBM*, pp. 7:1–7:12. ACM, 2015. URL <http://dblp.uni-trier.de/db/conf/ssdbm/ssdbm2015.html#MarquesCZS15>.
- Charles H Martin, Tongsu Peng, and Michael W Mahoney. Predicting trends in the quality of state-of-the-art neural networks without access to training or testing data. *Nature Communications*, 12(1):4122, 2021.
- Mladen Nikolic, Filip Maric, and Predrag Janicic. Simple algorithm portfolio for sat. *Artif. Intell. Rev.*, 40(4):457–465, 2013.
- Guansong Pang, Chunhua Shen, Longbing Cao, and Anton Van Den Hengel. Deep learning for anomaly detection: A review. *ACM computing surveys (CSUR)*, 54(2):1–38, 2021.
- Marcin Przewięźlikowski, Przemysław Przybyś, Jacek Tabor, M Zięba, and Przemysław Spurek. Hypermaml: Few-shot adaptation of deep models with hypernetworks. *arXiv preprint arXiv:2205.15745*, 2022.
- Shebuti Rayana. ODDS library, 2016.
- Lukas Ruff, Jacob R Kauffmann, Robert A Vandermeulen, Grégoire Montavon, Wojciech Samek, Marius Kloft, Thomas G Dietterich, and Klaus-Robert Müller. A unifying review of deep and shallow anomaly detection. *Proceedings of the IEEE*, 109(5):756–795, 2021.
- Jürgen Schmidhuber. Learning to control fast-weight memories: An alternative to dynamic recurrent networks. *Neural Computation*, 4(1):131–139, 1992.
- Bobak Shahriari, Kevin Swersky, Ziyu Wang, Ryan P. Adams, and Nando de Freitas. Taking the human out of the loop: A review of bayesian optimization. *Proc. IEEE*, 104(1):148–175, 2016. doi: 10.1109/JPROC.2015.2494218. URL <https://doi.org/10.1109/JPROC.2015.2494218>.

- Ashish Vaswani, Noam Shazeer, Niki Parmar, Jakob Uszkoreit, Llion Jones, Aidan N Gomez, Łukasz Kaiser, and Illia Polosukhin. Attention is all you need. In I. Guyon, U. Von Luxburg, S. Bengio, H. Wallach, R. Fergus, S. Vishwanathan, and R. Garnett (eds.), *Advances in Neural Information Processing Systems*, volume 30. Curran Associates, Inc., 2017. URL [https://proceedings.neurips.cc/paper\\_files/paper/2017/file/3f5ee243547dee91fbd053c1c4a845aa-Paper.pdf](https://proceedings.neurips.cc/paper_files/paper/2017/file/3f5ee243547dee91fbd053c1c4a845aa-Paper.pdf).
- Johannes von Oswald, Christian Henning, Benjamin F. Grewe, and João Sacramento. Continual learning with hypernetworks. In *International Conference on Learning Representations*, 2020. URL <https://arxiv.org/abs/1906.00695>.
- Xiaoxing Wang, Chao Xue, Junchi Yan, Xiaokang Yang, Yonggang Hu, and Kewei Sun. Mergenas: Merge operations into one for differentiable architecture search. In Christian Bessiere (ed.), *Proceedings of the Twenty-Ninth International Joint Conference on Artificial Intelligence, IJCAI-20*, pp. 3065–3072. International Joint Conferences on Artificial Intelligence Organization, 7 2020. doi: 10.24963/ijcai.2020/424. URL <https://doi.org/10.24963/ijcai.2020/424>. Main track.
- Kilian Weinberger, Anirban Dasgupta, John Langford, Alex Smola, and Josh Attenberg. Feature hashing for large scale multitask learning. In *Proceedings of the 26th annual international conference on machine learning*, pp. 1113–1120, 2009.
- Manzil Zaheer, Satwik Kottur, Siamak Ravanbakhsh, Barnabas Poczos, Russ R Salakhutdinov, and Alexander J Smola. Deep sets. *Advances in neural information processing systems*, 30, 2017.
- Chris Zhang, Mengye Ren, and Raquel Urtasun. Graph hypernetworks for neural architecture search. In *ICLR (Poster)*. OpenReview.net, 2019.
- Yue Zhao, Zain Nasrullah, and Zheng Li. Pyod: A python toolbox for scalable outlier detection. *Journal of Machine Learning Research*, 20:1–7, 2019.
- Yue Zhao, Ryan Rossi, and Leman Akoglu. Automatic unsupervised outlier model selection. In *Thirty-Fifth Conference on Neural Information Processing Systems*, 2021.
- Yue Zhao, Sean Zhang, and Leman Akoglu. Toward unsupervised outlier model selection. In *IEEE International Conference on Data Mining, ICDM*, pp. 773–782. IEEE, 2022.

## APPENDIX

## A META-TRAINING DETAILS

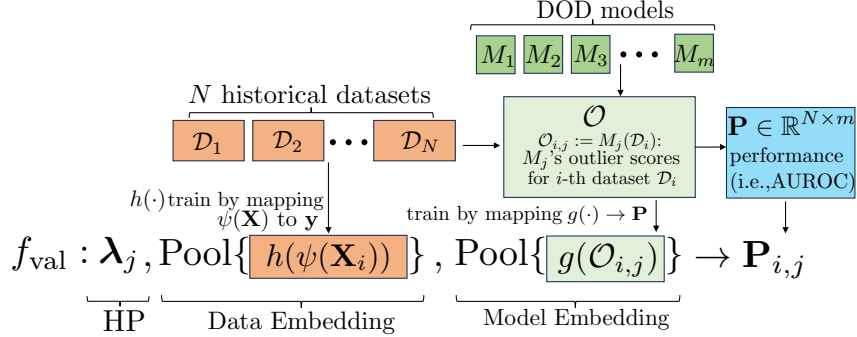

**Figure A1:** Illustration of the  $f_{\text{val}}$ . We use all historical datasets (i.e.,  $\mathbf{X}$  and ground-truth labels  $\mathbf{y}$ ) to train the data embeddings and historical embeddings, during which we obtain performance  $\mathbf{P}$  on the DOD models’ outlier scores  $\mathcal{O}$ . During the offline phase, We train  $h(\cdot)$ ,  $g(\cdot)$ , and  $f_{\text{val}}$ . During the online model selection time,  $f_{\text{val}}$  gives the performance estimation of a DOD model (with a specific HP  $\lambda$ ), on the embedding of the test dataset.

We provide details of training  $f_{\text{val}}$  in this section. Fig. A1 illustrate the training of  $f_{\text{val}}$  in Eq. (2).

**Data Embeddings.** We employ feature hashing Weinberger et al. (2009) to address the issue of that datasets may have different feature and sample sizes. Specifically, a hashing function  $\psi(\cdot)$ , is employed to project each dataset to a  $k$ -dimensional unified feature space, regardless of the number of features in the original data. To ensure sufficient expressiveness, the projection dimension should not be too small (e.g.,  $k = 256$  in our experiments).

Subsequently, we train a cross-dataset feature extractor  $h(\cdot)$ , a fully connected neural network, to map hashed samples to their corresponding outlier labels, i.e.  $h : \psi(\mathbf{X}_i) \mapsto \mathbf{y}_i$  for the  $i$ -th dataset. Finally, we use max-pooling to aggregate sample-wise representations into dataset-wise embeddings, denoted by  $\text{pool}\{h(\psi(\mathbf{X}_i))\}$ . The overall goal of  $h(\cdot)$  is to capture outlying characteristics of datasets, as demonstrated in the left middle of Fig. A1.

**Model Embeddings.** In addition to data embeddings, we have also designed model embeddings to capture the impact of model changes on the detection performance. To achieve this, existing work uses internal performance measures (IPMs) as model embeddings Zhao et al. (2022). IPMs are a set of unsupervised performance evaluation metrics for OD that solely rely on model outputs and/or input features. They serve as weak proxies for model performance (more details can be found in Ma et al. (2023)). However, the design of IPMs is typically handcrafted, and their computation at runtime can be computationally expensive.

To represent a trained DOD model more systematically, we utilize a neural network denoted as  $g(\cdot)$ , which maps the output outlier scores of the model to the corresponding detection performance, i.e.  $g : \mathcal{O}_{i,j} \mapsto \mathbf{P}_{i,j}$ . To handle the variability in the size of outlier scores, which can arise from differences in sample sizes across datasets, we employ the DeepSet architecture Zaheer et al. (2017) for  $g(\cdot)$ . The DeepSet architecture is designed to leverage the inherent permutation invariance of sets, meaning that the order of elements in a set does not affect its overall meaning. Similarly, the order of outlier scores does not impact the overall detection performance. In our approach, we use the output of the pooling layer in the DeepSet architecture, denoted as  $\text{pool}(g(\mathcal{O}_{i,j}))$ , as the model embedding. This pooling layer output effectively captures the information from the outlier scores and produces a fixed-size representation of the model’s performance, as shown in the right middle of Fig. A1.

Obtaining outlier scores  $\mathcal{O}_{i,j}$  requires training the DOD model, which can be computationally expensive. To speed up this process for meta-training, we use HN-generated weights other than training individual DOD models from scratch, to obtain  $\hat{\mathcal{O}}_{i,j} := M_j(\mathcal{D}_i; \widehat{\mathbf{W}}_\phi^{(i)}(\lambda_j))$ , where  $\widehat{\mathbf{W}}_\phi^{(i)}(\lambda_j)$  denotes model  $M_j$ ’s weights as generated by our HN trained on  $\mathcal{D}_i$ , and  $\lambda_j$  are over existing  $\lambda_{\text{meta}}$ .

**Training  $f_{\text{val}}$ .** The goal of  $f_{\text{val}}$  is to map the aforementioned components, e.g., HPs, data embeddings, and model embeddings, onto the corresponding model performance across  $N$  historical datasets and

$m$  models with varying HP configurations. The choice of  $f_{\text{val}}$  can be flexible: we use lightGBM Ke et al. (2017) in this work; although one may use any regressor.

We decide the hyperparameters associated with  $\psi(\cdot)$ ,  $h(\cdot)$ ,  $g(\cdot)$ , and  $f_{\text{val}}$  by the cross-validation of the historical datasets. The goal is to optimize the performance of  $f_{\text{val}}$  on the historical datasets. We provide additional meta-training details in §C.2.

## B HYPERNETWORK DETAILS

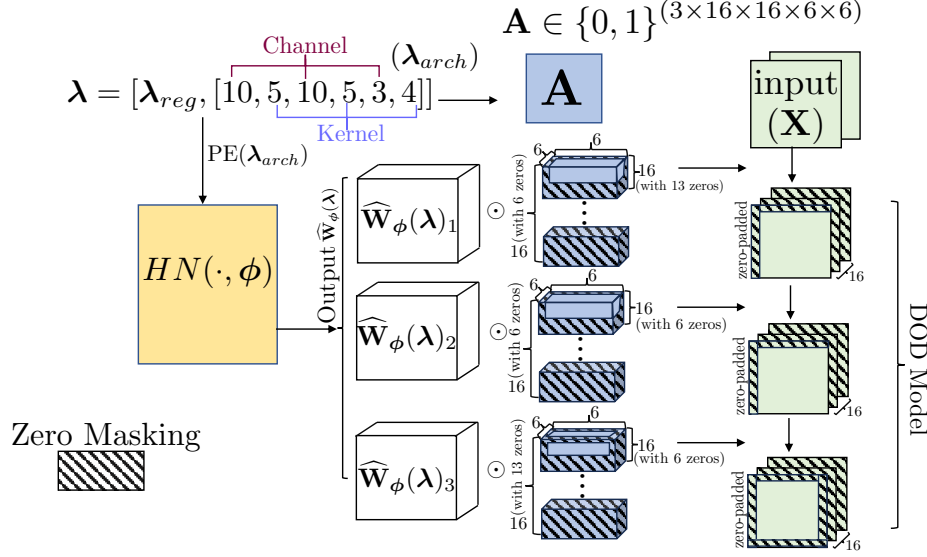

**Figure B2:** Illustration of the proposed HN. HN generates weights for a 3-layer convolutional networks, with channels equal to  $[10, 10, 3]$ , and kernels equal to  $[5, 5, 4]$ . The HN weights  $\widehat{\mathbf{W}}_{\phi}$  is of size  $3 \times 16 \times 16 \times 6 \times 6$ , and similarly we construct the same-size architecture masking  $\mathbf{A}$ . At the first layer, we need to pad  $\mathbf{A}$  for 1 zero, among the third and fourth dimension (we pad starting from the left and from the top). This will enable us to extend  $\widehat{\mathbf{W}}_{\phi}$  to a convolutional operation of kernel size 5, from fixed kernel size 6. To match the padding operation, we also pad the input  $\mathbf{X}$  along the first and second dimension, with 1. The rest layers follow similarly.

**Architecture Masking for Convolution Operations.** Since more complex data such as images and videos are used as mediums to find anomalies, many DOD models have taken convolutional networks as the backbone structure. Therefore, how to tune convolution operation within the DOD model has been an emergent problem. Here we design the input of the HN  $\lambda_{\text{arch}}$  and the architecture  $\mathbf{A}$  in a format that could alter output of the HN output  $\widehat{\mathbf{W}}_{\phi}$  to adapt to various architectures.

For convolutional networks, despite that we are able to tune depths and channels, we can also include kernel sizes and dilation rate by properly padding  $\widehat{\mathbf{W}}_{\phi}$  with zeros Wang et al. (2020). For our demonstration purposes, we only include the kernel size as the additional turnable variable. We make HN output  $\widehat{\mathbf{W}}_{\phi} \in \mathbb{R}^{(D \times M_{ch} \times M_{ch} \times M_k \times M_k)}$ , where  $D$ ,  $M_{ch}$ ,  $M_k$  represent maximum number of layers, channels, and kernel size specified in  $\mathbf{A}$ , respectively.

Assume  $\lambda_{\text{arch}}$  contains the abstraction of a smaller architectures, e.g.  $L$  layers with corresponding channel values  $\{M_{c1}, M_{c2}, \dots, M_{cL}\}$  all less than or equal to  $M_{ch}$ , and  $\{K_1, K_2, \dots, K_L\}$  are less than or equal to  $M_k$ . Then, the  $\lambda_{\text{arch}} \in \mathbb{N}^{2D}$  is given as:

$$\lambda_{\text{arch}} = [M_{c1}, K_1, M_{c2}, K_2, \dots, M_{c\lfloor L/2 \rfloor}, K_{\lfloor L/2 \rfloor}, \underbrace{0, \dots, 0}_{2(D-L) \text{ zeros}}, M_{c\lfloor L/2 \rfloor + 1}, K_{\lfloor L/2 \rfloor + 1}, \dots, M_{cL}, K_L].$$

The architecture masking  $\mathbf{A} \in \{0, 1\}^{(D \times M_{ch} \times M_{ch} \times M_k \times M_k)}$  is constructed as the following:

$$\begin{cases} \mathbf{A}_{[l, 0: \lambda_{\text{arch}}[2 \times l], :, [\frac{M_{ch}}{2} - \lfloor \frac{\lambda_{\text{arch}}[2 \times l + 1]}{2} \rfloor : \lfloor \frac{M_{ch}}{2} \rfloor + \lfloor \frac{\lambda_{\text{arch}}[2 \times l + 1]}{2} \rfloor]]} = 1 & , \text{ if } l = 0 \\ \mathbf{A}_{[l, 0: \lambda_{\text{arch}}[2 \times l], 0: \lambda_{\text{arch}}[2 \times (l - z)], [\frac{M_{ch}}{2} - \lfloor \frac{\lambda_{\text{arch}}[2 \times l + 1]}{2} \rfloor : \lfloor \frac{M_{ch}}{2} \rfloor + \lfloor \frac{\lambda_{\text{arch}}[2 \times l + 1]}{2} \rfloor]]} = 1 & , \text{ otherwise} \end{cases} \quad (8)$$

Again,  $\lambda_{arch}[2 \times (l - z)]$  is the last entry corresponding to the non-zero input channel in  $\lambda_{arch}[2 \times l]$ . Similar to the linear operation, at layer  $l$ , if  $\lambda_{arch}[2 \times l]$  is all zero, then the resulting  $\mathbf{A}_{[l, :, :, :, :]}$  would contain only zeros and represent a "No-op" in the DOD model. Otherwise, assume we want obtain a smaller kernel size,  $K_l \leq M_k$  at layer  $l$ , the corresponding  $\mathbf{A}_{[l, :, :, :, :]}$  pads zeros around the size  $M_{ch} \times k \times k$  center (See Figure B2). The masked weights  $\mathbf{A}_{[l, :, :, :, :]} \odot \widehat{\mathbf{W}}_{\phi, l}$  are equivalent to obtaining smaller-size kernel weights. Notice that, when kernel sizes are different, the output of the layer's operation will also differ (smaller kernels would result in larger output size); therefore, we need to guarantee the spatial size by similarly padding zeros around the input of that convolutional layer. The padding is similar to how we construct the architecture masking  $\mathbf{A}$  and similar to the padding approach discussed in Wang et al. (2020).

**Extending to Other Architectures.** We envision our proposed HN can be extended to other architectures, for example, to tune the number of attention heads and dimensions of query, key and values in the multi-headed attention mechanism Vaswani et al. (2017). We will continuously work on the implementations for other architectures, as more complex DOD models are developed recently.

## C ADDITIONAL EXPERIMENT SETTINGS AND RESULTS

### C.1 DATASETS

To build a comprehensive testbed, we use 15 OD datasets from the DAMI repository<sup>3</sup> and 20 OD datasets from the ODDS repository<sup>4</sup>. All of these benchmark datasets are widely used in OD research. We provide the dataset summary in Table C1.

**Table C1:** The tabular testbed includes 35 datasets from DAMI and ODDS repositories.

| Dataset               | Source | #Samples | #Dims | %Outlier |
|-----------------------|--------|----------|-------|----------|
| DAMI_Anthyroid        | DAMI   | 7129     | 21    | 7.49     |
| DAMI_Cardiotocography | DAMI   | 2114     | 21    | 22.04    |
| DAMI_Glass            | DAMI   | 214      | 7     | 4.21     |
| DAMI_HeartDisease     | DAMI   | 270      | 13    | 44.44    |
| DAMI_PageBlocks       | DAMI   | 5393     | 10    | 9.46     |
| DAMI_PenDigits        | DAMI   | 9868     | 16    | 0.2      |
| DAMI_Pima             | DAMI   | 768      | 7     | 34.9     |
| DAMI_Shuttle          | DAMI   | 1013     | 9     | 1.28     |
| DAMI_SpamBase         | DAMI   | 4207     | 57    | 39.91    |
| DAMI_Stamps           | DAMI   | 340      | 9     | 9.12     |
| DAMI_Waveform         | DAMI   | 3443     | 21    | 2.9      |
| DAMI_WBC              | DAMI   | 223      | 9     | 4.48     |
| DAMI_WDBC             | DAMI   | 367      | 30    | 2.72     |
| DAMI_Wilt             | DAMI   | 4819     | 5     | 5.33     |
| DAMI_WPBC             | DAMI   | 198      | 33    | 23.74    |
| ODDS_anthyroid        | ODDS   | 7200     | 6     | 7.42     |
| ODDS_arrhythmia       | ODDS   | 452      | 274   | 14.6     |
| ODDS_breastw          | ODDS   | 683      | 9     | 34.99    |
| ODDS_glass            | ODDS   | 214      | 9     | 4.21     |
| ODDS_ionosphere       | ODDS   | 351      | 33    | 35.9     |
| ODDS_letter           | ODDS   | 1600     | 32    | 6.25     |
| ODDS_lympho           | ODDS   | 148      | 18    | 4.05     |
| ODDS_mammography      | ODDS   | 11183    | 6     | 2.32     |
| ODDS_mnist            | ODDS   | 7603     | 100   | 9.21     |
| ODDS_musk             | ODDS   | 3062     | 166   | 3.17     |
| ODDS_optdigits        | ODDS   | 5216     | 64    | 2.88     |
| ODDS_pendigits        | ODDS   | 6870     | 16    | 2.27     |
| ODDS_satellite        | ODDS   | 6435     | 36    | 31.64    |
| ODDS_satimage-2       | ODDS   | 5803     | 36    | 1.22     |
| ODDS_speech           | ODDS   | 3686     | 400   | 1.65     |
| ODDS_thyroid          | ODDS   | 3772     | 6     | 2.47     |
| ODDS_vertebral        | ODDS   | 240      | 6     | 12.5     |
| ODDS_vowels           | ODDS   | 1456     | 12    | 3.43     |
| ODDS_wbc              | ODDS   | 378      | 30    | 5.56     |
| ODDS_wine             | ODDS   | 129      | 13    | 7.75     |

<sup>3</sup>DAMI repository: <https://www.dbs.ifi.lmu.de/research/outlier-evaluation/DAMI/>

<sup>4</sup>ODDS repository: <https://odds.cs.stonybrook.edu/>



**Table C2:** HYPER and baselines for time and performance comparison with categorization by whether it selects models (2nd column), uses meta-learning (3rd column), and requires model building at the test time (4th column). Overall, HYPER (with patience  $p = 3$ ) achieves the best detection performances (also see Fig. 4 and 5). Compared to the SOTA ELECT, HYPER has markedly shorter offline and online time with the help of HN.

| Method  | Model Selection | Meta Learning | Zero shot | Offline Time (mins.) | Average Online Time (mins.) | Median Online Time (mins.) | Avg. ROC Rank ( $\downarrow$ better) |
|---------|-----------------|---------------|-----------|----------------------|-----------------------------|----------------------------|--------------------------------------|
| Default | ✗               | ✗             | ✓         | N/A                  | 0                           | 0                          | 59.54%                               |
| Random  | ✗               | ✗             | ✓         | N/A                  | 0                           | 0                          | 56.03%                               |
| MC      | ✓               | ✗             | ✗         | N/A                  | 215                         | 277                        | 56.42%                               |
| GB      | ✓               | ✓             | ✓         | 7,461                | 0                           | 0                          | 46.68%                               |
| ISAC    | ✓               | ✓             | ✓         | 7,466                | 1                           | 1                          | 41.81%                               |
| AS      | ✓               | ✓             | ✓         | 7,465                | 1                           | 1                          | 52.22%                               |
| MetaOD  | ✓               | ✓             | ✓         | 7,525                | 1                           | 1                          | 39.18%                               |
| ELECT   | ✓               | ✓             | ✗         | 7,611                | 59                          | 71                         | 36.21%                               |
| Ours    | ✓               | ✓             | ✗         | 1,320                | 14                          | 17                         | 29.54%                               |

## C.2 ALGORITHM SETTINGS AND BASELINES

In this section, we present additional experiment settings and describe the baselines. For detailed implementation information, please see <https://github.com/inreview23/HYPER>.

**Setting of the HN:** The HN utilized in the experiments consists of two hidden layers, each containing 200 neurons. It is configured with a learning rate of  $1e-4$ , a dropout rate of 0.2, and a batch size of 512. We find this setting give enough capacity to generate various weights for linearAEs. Because of the meta-learning setting, the hyperparameters of HN can be tested with validation data and test results, on historical data.

**Meta-training for  $f_{val}$ .** Table C6 includes the HP search space for training. In the table, compression rate refers to how many of the widths to shrink between two adjacent layers. For example, if the first layer has width of 6, compression\_rate equals 2 would give the next layer width equal to 3. We also notice that some datasets may have smaller numbers of features. Thus, with the corresponding compression rate, we also have discretized the width to the nearest integer number. Thus, for some datasets, the HP search space will be smaller than 240.

**HN (Re-)Training during the Online Phase:** In order to facilitate effective local re-training, we set a training epoch of  $T = 100$  for each iteration, indicating the sampling of 100 local HPs for HN retraining. In Eq. (4), we designate the number of sampled HPs and the sampling factor as 500, i.e.,  $V_\lambda = V_\sigma = 500$ . The minimum depth and maximum depth of the searched DOD models are set to 2 and 8, respectively. Essentially, we tune the DOD model depth within the integer range of 2 to 8.

**Convergence:** To achieve favorable performance within a reasonable timeframe, we set the patience value as  $p = 3$  in the experiment. Further analysis for the impact of patience is available in §C.3.2.

**Baselines:** We have incorporated 8 baselines, encompassing a spectrum from simple to state-of-the-art (SOTA) approaches. Table C2 offers a comprehensive conceptual comparison of these baselines.

(i) *no model selection:*

- (1) **Default** employs the default HPs utilized in the widely-used OD library PyOD Zhao et al. (2019). This serves as the default option for practitioners when no additional information is available.
- (2) **Random** randomly selects an HP/model (the reported performance represents the expected value obtained by averaging across all DOD models).

(ii) *model selection without meta-learning:*

- (3) **MC** Ma et al. (2023) utilizes the consensus among a group of DOD models to assess the performance of a model. A model is considered superior if its outputs are closer to the consensus of the group. MC necessitates the construction of a model group during the testing phase. For more details, please refer to a recent survey Ma et al. (2021).

(iii) *model selection by meta-learning* requires first building a corpus of historical datasets on a group of defined DOD models and then selecting the best from the model set at the test time. Although these baselines utilize meta-learning, none of them take advantage of the HN for acceleration.

- (4) **Global Best (GB)** selects the best-performing model based on the average performance across historical datasets.
- (5) **ISAC Kadioglu et al. (2010)** groups historical datasets into clusters and predicts the cluster of the test data, subsequently outputting the best model from the corresponding cluster.
- (6) **ARGOSMART (AS) Nikolic et al. (2013)** measures the similarity between the test dataset and all historical datasets, and then outputs the best model from the most similar historical dataset.
- (7) **MetaOD Zhao et al. (2021)** employs matrix factorization to capture both dataset similarity and model similarity, representing one of the state-of-the-art methods for unsupervised OD model selection.
- (8) **ELECT Zhao et al. (2022)** iteratively identifies the best model for the test dataset based on performance similarity to the historical dataset. Unlike the above meta-learning approaches, ELECT requires model building during the testing phase to compute performance-based similarity.

**Baseline Model Set.** We use the same HP search spaces for baseline models as well as the HN-trained models. Table C6 provides the detailed HP search space.

### C.3 ADDITIONAL ABLATIONS

#### C.3.1 EFFECT OF META-INITIALIZATION

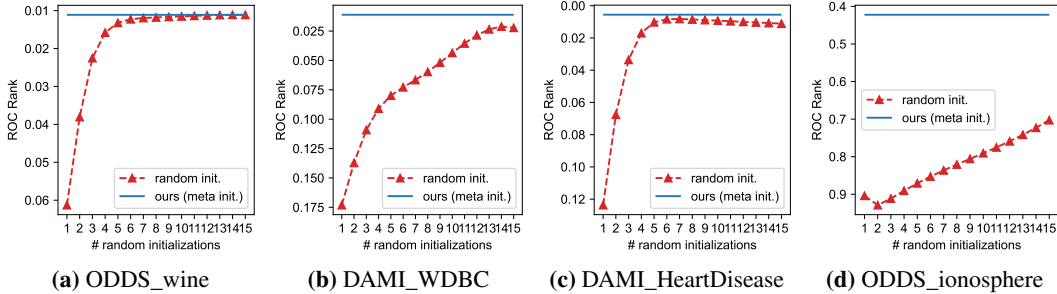

**Figure C3:** Comparison of ROC Rank (lower is better) of HYPER with meta-initialization (in blue) with increasing numbers of randomly initialized HNs. For instance, it needs 9 randomly initialized HNs to achieve the same performance as HYPER on ODDS\_wine. In general, HYPER shows better efficiency in finding a good model with much less running time.

As mentioned in §3.2, HYPER initializes the HPs to the “global best HPs” derived from the historical training datasets. Specifically, in each fold comprising 7 test datasets, we utilize the HPs that yield the best average performance across the remaining 28 training datasets as the initial HPs. This meta-initialization approach leverages meta-learning to initialize HYPER with a potentially promising HP configuration.

In Figure C3, we demonstrate the effectiveness of meta-initialization by comparing it with random initialization on five datasets. In addition to utilizing meta-initialization, one could run HYPER multiple times with randomly initialized HPs and select the best model based on  $f_{val}$ . However, it should be noted that  $f_{val}$  serves as a proxy validator rather than ground truth. Therefore, including more randomly initialized HNs does not guarantee a monotonic improvement in the selected model’s performance. Nonetheless, increasing the number of random initializations is likely to yield a better performance by exploring a broader range of search spaces.

To simulate this scenario, we vary the number of random initializations (x-axis) and record all the  $f_{val}$  values along with the corresponding ROC Rank. For each dataset, we select the best model based on  $f_{val}$  across *all* trials. We increase the number of random trials from 1 to 15, where the highest  $f_{val}$  value among the 15 random initialized trials is chosen as the best model. The y-axis represents the average performance from independent trials.

The figure clearly demonstrates the advantage of meta-initialization as a strong starting point for HYPER’s HP tuning. For example, on the `ODDS_wine` dataset (refer to Fig. C3a), it requires 9 randomly initialized HNs to attain the same performance as our approach with meta-initialization, showing a 9-fold increase in the time required for online selection. In other cases (Fig. C3b, C3c, and C3d), training 15 randomly initialized HNs fails to achieve the same performance as meta-initialization, further validating its advantages.

### C.3.2 EFFECT OF PATIENCE

As described in §3.1, the convergence criterion for HYPER is based on the highest predicted performance by  $f_{\text{val}}$  remaining unchanged for  $\rho$  consecutive iterations. A larger value of  $\rho$ , also known as “patience”, requires more iterations for convergence but is likely to yield better results. As illustrated in Fig. C4, increasing the value of  $\rho$  allows for more exploration and potentially better performance. However, this also prolongs the convergence time.

In our experiments, we set  $\rho=3$  to balance performance and runtime. The specific value of  $\rho$  can be determined through cross-validation over the historical datasets, taking into account the specific criteria and requirements of the underlying application.

### C.4 ADDITIONAL RESULTS

In addition to the distribution plot in Fig. 5, we provide the  $p$ -values of Wilcoxon signed rank test between HYPER and baselines in C3. See §5 for the experiment analysis.

**Table C3:** Pairwise statistical tests between HYPER and baselines by Wilcoxon signed rank test. HYPER are statistically better than the baselines and its variants at different significance levels. See Fig.5 for distribution rank with statistical comparison.

| Ours | Baseline         | p-value |
|------|------------------|---------|
| Ours | Default          | 0.0016  |
| Ours | Random           | 0.0001  |
| Ours | ISAC             | 0.0025  |
| Ours | AS               | 0.0052  |
| Ours | MetaOD           | 0.0030  |
| Ours | Global Best      | 0.0015  |
| Ours | MC               | 0.0005  |
| Ours | ELECT            | 0.0568  |
| Ours | Ours (reg&width) | 0.0001  |
| Ours | Ours (reg&depth) | 0.0001  |
| Ours | Ours (reg only)  | 0.0001  |

We present the full results in Table C4 and C5. Note that ROC Rank is based on each method’s performance in regard to the baseline model set’s performance described in §C.2.

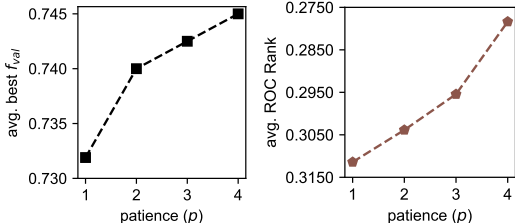

**Figure C4:** Analysis of the effect of patience  $\rho$ : (left) avg.  $f_{\text{val}}$  value change when increasing  $\rho$  from 1 to 4; (right) avg. ROC Rank with increasing  $\rho$ . Larger  $\rho$  leads to more exploration and likely better performance.

Table C4: ROC of the evaluated methods. The best method per dataset (row) is highlighted in bold.

| Dataset               | Default       | Random        | MC            | GB            | ISAC          | AS            | MetaOD        | ELECT         | Ours          |
|-----------------------|---------------|---------------|---------------|---------------|---------------|---------------|---------------|---------------|---------------|
| DAMI_Anthyroid        | <b>0.7124</b> | 0.5972        | 0.6123        | 0.5929        | 0.6018        | 0.5873        | 0.6050        | 0.6148        | 0.5888        |
| DAMI_Cardiotocography | 0.7159        | 0.7202        | 0.7024        | 0.7740        | 0.7571        | 0.6940        | 0.6458        | 0.7818        | <b>0.7866</b> |
| DAMI_Glass            | <b>0.7442</b> | 0.7055        | 0.6304        | 0.7244        | 0.6699        | 0.7230        | 0.7225        | 0.7431        | 0.6917        |
| DAMI_HeartDisease     | 0.3045        | 0.4276        | 0.4214        | 0.5250        | 0.5382        | 0.4214        | 0.5312        | 0.5348        | <b>0.5926</b> |
| DAMI_PageBlocks       | 0.8722        | 0.9107        | 0.9219        | 0.9162        | <b>0.9255</b> | 0.9002        | 0.6247        | 0.8791        | 0.9215        |
| DAMI_PenDigits        | 0.3837        | 0.5248        | 0.5422        | 0.5491        | 0.5069        | <b>0.6953</b> | 0.6278        | 0.5084        | 0.6792        |
| DAMI_Pima             | 0.4005        | 0.5508        | 0.4855        | 0.6216        | 0.6279        | 0.6158        | 0.4862        | 0.6281        | <b>0.6595</b> |
| DAMI_Shuttle          | 0.6453        | 0.9462        | 0.9400        | 0.9342        | 0.9436        | <b>0.9530</b> | 0.5525        | 0.9405        | 0.9391        |
| DAMI_SpamBase         | 0.5208        | 0.5232        | 0.4907        | 0.5210        | 0.5263        | <b>0.5552</b> | 0.5307        | 0.5135        | 0.5525        |
| DAMI_Stamps           | 0.8687        | 0.8687        | 0.8926        | 0.8981        | <b>0.9079</b> | 0.8618        | 0.7112        | 0.8897        | 0.9003        |
| DAMI_Waveform         | 0.6810        | 0.6772        | 0.6560        | 0.6941        | 0.6924        | 0.6890        | 0.6900        | <b>0.7019</b> | 0.6929        |
| DAMI_WBC              | 0.7493        | 0.9769        | 0.9770        | 0.9682        | 0.9742        | 0.9779        | 0.9809        | 0.9779        | <b>0.9826</b> |
| DAMI_WDBC             | 0.8092        | 0.8366        | 0.8146        | 0.8597        | 0.8683        | 0.8092        | 0.8361        | 0.8213        | <b>0.9039</b> |
| DAMI_Wilt             | <b>0.5080</b> | 0.4524        | 0.4832        | 0.4653        | 0.4700        | 0.4700        | 0.4714        | 0.4700        | 0.3709        |
| DAMI_WPBC             | 0.4090        | 0.4464        | 0.3972        | 0.4679        | 0.4548        | 0.4285        | 0.4456        | 0.4726        | <b>0.4824</b> |
| ODDS_anthyroid        | <b>0.7353</b> | 0.6981        | 0.6963        | 0.6982        | 0.7067        | 0.7067        | 0.6903        | 0.7058        | 0.7014        |
| ODDS_arrhythmia       | 0.7769        | 0.7786        | 0.7810        | 0.7767        | <b>0.7831</b> | 0.7798        | 0.7824        | 0.7807        | 0.7827        |
| ODDS_breastw          | 0.5437        | 0.6187        | 0.8939        | <b>0.9071</b> | 0.8032        | 0.7986        | 0.5913        | 0.8649        | 0.9045        |
| ODDS_glass            | <b>0.6195</b> | 0.5849        | 0.5453        | 0.5897        | 0.5962        | 0.5962        | 0.5654        | 0.5957        | 0.5993        |
| ODDS_ionosphere       | 0.8708        | 0.8497        | <b>0.8711</b> | 0.8252        | 0.8422        | 0.8350        | 0.8727        | 0.8686        | 0.8509        |
| ODDS_letter           | 0.5555        | 0.5758        | 0.5918        | 0.6068        | 0.6244        | 0.6155        | <b>0.6446</b> | 0.6211        | 0.6102        |
| ODDS_lympho           | 0.9096        | 0.9959        | 0.9988        | 0.9842        | 0.9929        | 0.9953        | 0.9971        | <b>1.0000</b> | 0.9925        |
| ODDS_mammography      | 0.5287        | 0.7612        | 0.7233        | 0.8362        | 0.7189        | 0.7116        | <b>0.8640</b> | 0.7673        | 0.8542        |
| ODDS_mnist            | 0.8518        | 0.8915        | 0.8662        | 0.8959        | 0.9011        | 0.8580        | <b>0.9070</b> | 0.9032        | 0.8994        |
| ODDS_musk             | 0.9940        | <b>1.0000</b> | <b>1.0000</b> | <b>1.0000</b> | <b>1.0000</b> | <b>1.0000</b> | <b>1.0000</b> | <b>1.0000</b> | <b>1.0000</b> |
| ODDS_optdigits        | 0.5104        | 0.4950        | 0.5092        | 0.4806        | 0.5115        | 0.5171        | 0.4973        | 0.5338        | <b>0.5584</b> |
| ODDS_pendigits        | 0.9263        | 0.9295        | 0.9265        | 0.9305        | 0.9208        | 0.9386        | 0.9360        | 0.9346        | <b>0.9435</b> |
| ODDS_satellite        | <b>0.7681</b> | 0.7284        | 0.7445        | 0.7352        | 0.7433        | 0.7324        | 0.7486        | 0.7571        | 0.7432        |
| ODDS_satimage-2       | 0.9707        | 0.9826        | <b>0.9865</b> | 0.9744        | 0.9838        | 0.9798        | 0.9871        | 0.9786        | 0.9853        |
| ODDS_speech           | 0.4761        | 0.4756        | 0.4692        | 0.4726        | <b>0.4832</b> | 0.4692        | 0.4706        | 0.4774        | 0.4707        |
| ODDS_thyroid          | <b>0.9835</b> | 0.9661        | 0.9652        | 0.9535        | 0.9635        | 0.9652        | 0.9740        | 0.9689        | 0.9667        |
| ODDS_vertebral        | <b>0.6019</b> | 0.5378        | 0.5629        | 0.5253        | 0.4602        | 0.5629        | 0.4657        | 0.5629        | 0.4757        |
| ODDS_vowels           | 0.4897        | 0.5903        | 0.5965        | 0.6309        | 0.6414        | <b>0.6686</b> | 0.6216        | 0.5247        | <b>0.6686</b> |
| ODDS_wbc              | 0.4146        | 0.8401        | 0.7640        | 0.8808        | 0.8745        | 0.8469        | 0.8770        | 0.8469        | <b>0.9289</b> |
| ODDS_wine             | 0.7864        | 0.5430        | 0.4084        | 0.7539        | 0.5387        | 0.4084        | 0.6296        | 0.6218        | <b>0.8287</b> |

**Table C5:** ROC Rank (smaller the better) of the evaluated methods. The best method per dataset (row) is highlighted in bold.

| Dataset             | Default       | Random | MC            | GB            | ISAC          | AS            | MetaOD        | ELECT         | Ours          |
|---------------------|---------------|--------|---------------|---------------|---------------|---------------|---------------|---------------|---------------|
| DAMI_Anthyroid      | <b>0.0079</b> | 0.5317 | 0.1111        | 0.6031        | 0.4206        | 0.7143        | 0.3492        | 0.0794        | 0.6984        |
| DAMI_Cardiocography | 0.5635        | 0.4683 | 0.6190        | 0.0476        | 0.1984        | 0.6825        | 1.0000        | 0.0476        | <b>0.0238</b> |
| DAMI_Glass          | <b>0.0556</b> | 0.7222 | 0.9365        | 0.1984        | 0.9048        | 0.5556        | 0.5635        | 0.0595        | 0.8016        |
| DAMI_HeartDisease   | 0.9841        | 0.5556 | 0.5873        | 0.1032        | 0.0238        | 0.5714        | 0.0476        | 0.0317        | <b>0.0079</b> |
| DAMI_PageBlocks     | 1.0000        | 0.4921 | 0.2698        | 0.4048        | <b>0.1667</b> | 0.7937        | 1.0000        | 0.9841        | 0.2937        |
| DAMI_PenDigits      | 0.9048        | 0.5317 | 0.4722        | 0.4206        | 0.6429        | <b>0.0714</b> | 0.1349        | 0.6270        | 0.0794        |
| DAMI_Pima           | 1.0000        | 0.5159 | 0.9603        | 0.1508        | 0.0635        | 0.2540        | 0.6508        | 0.0556        | <b>0.0079</b> |
| DAMI_Shuttle        | 1.0000        | 0.4444 | 0.9365        | 1.0000        | 0.5635        | <b>0.2381</b> | 1.0000        | 0.7302        | 0.9683        |
| DAMI_SpamBase       | 0.6349        | 0.5556 | 0.9921        | 0.6270        | 0.3571        | <b>0.0397</b> | 0.1825        | 0.8016        | 0.0556        |
| DAMI_Stamps         | 0.5238        | 0.5238 | 0.2619        | 0.1587        | <b>0.0635</b> | 0.6032        | 1.0000        | 0.2857        | 0.1349        |
| DAMI_Waveform       | 0.4762        | 0.5556 | 0.8175        | 0.1429        | 0.2143        | 0.2619        | 0.2619        | <b>0.0556</b> | 0.1905        |
| DAMI_WBC            | 1.0000        | 0.7381 | 0.7381        | 0.9921        | 0.9365        | 0.5873        | 0.0079        | 0.5873        | <b>0.0079</b> |
| DAMI_WDBC           | 0.8095        | 0.5397 | 0.7619        | 0.2381        | 0.0873        | 0.8016        | 0.5556        | 0.6984        | <b>0.0159</b> |
| DAMI_Wilt           | <b>0.0159</b> | 0.7302 | 0.0238        | 0.7143        | 0.7143        | 0.7143        | 0.0397        | 0.7143        | 0.9762        |
| DAMI_WPBC           | 1.0000        | 0.4365 | 1.0000        | 0.2302        | 0.3413        | 0.8175        | 0.4524        | 0.1667        | <b>0.0079</b> |
| ODDS_anthyroid      | <b>0.0397</b> | 0.3651 | 0.3889        | 0.3571        | 0.2381        | 0.2302        | 0.7937        | 0.2540        | 0.3016        |
| ODDS_arrhythmia     | 0.7063        | 0.5556 | 0.2302        | 0.7222        | <b>0.1270</b> | 0.3889        | 0.1587        | 0.2857        | 0.1349        |
| ODDS_breastw        | 0.5794        | 0.5317 | 0.1032        | 0.0714        | 0.3095        | 0.3333        | 0.5317        | 0.1905        | <b>0.0794</b> |
| ODDS_glass          | <b>0.2143</b> | 0.3571 | 0.9048        | 0.3333        | 0.2937        | 0.2857        | 0.5159        | 0.3095        | 0.2857        |
| ODDS_ionosphere     | 0.0872        | 0.4841 | <b>0.0873</b> | 0.9683        | 0.5714        | 0.8254        | 0.0476        | 0.1587        | 0.4603        |
| ODDS_letter         | 0.6746        | 0.6429 | 0.4762        | 0.3333        | <b>0.0476</b> | 0.1349        | 0.0079        | 0.0635        | 0.2539        |
| ODDS_lympho         | 1.0000        | 0.4921 | 0.2143        | 1.0000        | 0.9365        | 0.6429        | 0.4365        | <b>0.0437</b> | 0.9365        |
| ODDS_mammography    | 1.0000        | 0.3889 | 0.8968        | 0.2381        | 0.9127        | 0.9286        | <b>0.0317</b> | 0.3571        | 0.0714        |
| ODDS_mnist          | 0.9286        | 0.6746 | 0.8651        | 0.6190        | 0.4603        | 0.9048        | <b>0.1270</b> | 0.3492        | 0.5238        |
| ODDS_musk           | 1.0000        | 0.8810 | <b>0.3730</b> | <b>0.3730</b> | <b>0.3730</b> | <b>0.3730</b> | <b>0.3730</b> | <b>0.3730</b> | <b>0.3730</b> |
| ODDS_optdigits      | 0.3651        | 0.5714 | 0.4048        | 0.6825        | 0.3333        | 0.2063        | 0.5238        | 0.1032        | <b>0.0397</b> |
| ODDS_pendigits      | 0.7222        | 0.6587 | 0.7222        | 0.6269        | 0.8254        | 0.1825        | 0.2619        | 0.3730        | <b>0.0397</b> |
| ODDS_satellite      | <b>0.0238</b> | 0.7222 | 0.2778        | 0.6825        | 0.3651        | 0.7063        | 0.0873        | 0.0317        | 0.3889        |
| ODDS_satimage-2     | 1.0000        | 0.6270 | 0.0556        | 0.9841        | 0.4048        | 0.8413        | <b>0.0317</b> | 0.9048        | 0.0714        |
| ODDS_speech         | 0.4048        | 0.4286 | 0.8651        | 0.5873        | <b>0.1825</b> | 0.8730        | 0.6825        | 0.3810        | 0.6746        |
| ODDS_thyroid        | <b>0.0079</b> | 0.4841 | 0.5556        | 1.0000        | 0.6905        | 0.5635        | 0.0476        | 0.4603        | 0.4762        |
| ODDS_vertebral      | <b>0.0159</b> | 0.6984 | 0.3571        | 0.7381        | 0.9127        | 0.5159        | 0.8730        | 0.3571        | 0.8254        |
| ODDS_vowels         | 1.0000        | 0.5873 | 0.5397        | 0.3254        | 0.2063        | <b>0.1111</b> | 0.3730        | 0.8016        | <b>0.1111</b> |
| ODDS_wbc            | 1.0000        | 0.6349 | 0.9762        | 0.1746        | 0.2460        | 0.5714        | 0.2063        | 0.5714        | <b>0.0079</b> |
| ODDS_wine           | 0.0238        | 0.4841 | 0.9603        | 0.0397        | 0.5000        | 0.9603        | 0.3333        | 0.3810        | <b>0.0159</b> |
| Avg. ROC Rank       | 0.5954        | 0.5603 | 0.5642        | 0.4668        | 0.4181        | 0.5222        | 0.3918        | 0.3621        | 0.2954        |

**Table C6:** Hyperparameter search space for both free-range and HN models. We give the list of HPs as well as the range of the selected HPs.

| List of Hyperparameters (HPs)                                   | # HPs |
|-----------------------------------------------------------------|-------|
| n_layers: [2,4,6,8]                                             | 4     |
| compression_rate: [1.0,1.2,1.4,1.6,1.8,2.0,2.2,2.4,2.6,2.8,3.0] | 10    |
| dropout: [0.0,0.2,0.4]                                          | 3     |
| weight_decay: [0.0,1e-6,1e-5]                                   | 3     |
| Total Number:                                                   | 240   |
